# Supplementary material for: Association of PXR and CAR Polymorphisms and Antituberculosis Drug-Induced Hepatotoxicity
Source: PubMed Central journal article supplement (PMC6379441; doi:10.1038/s41598-018-38452-z), 2019-02-18
Supplement: 41598_2018_38452_MOESM1_ESM.pdf [file 41598_2018_38452_MOESM1_ESM.pdf]

Supplementary Materials

## Association of PXR and CAR Polymorphisms and Antituberculosis Drug-Induced Hepatotoxicity

Yu Wang,<sup>a</sup> Xi Xiang,<sup>a</sup> Wei-Wei Huang,<sup>a</sup> Andrew J Sandford,<sup>b</sup> Shou-Quan Wu,<sup>a</sup> Miao-Miao  
Zhang,<sup>a</sup> Ming-Gui Wang,<sup>a</sup> Guo Chen,<sup>a,c</sup> Jian-Qing He<sup>a\*</sup>

<sup>a</sup>Department of Respiratory and Critical Care Medicine, West China Hospital, Sichuan University,  
Chengdu, Sichuan, China

<sup>b</sup>Centre for Heart Lung Innovation, University of British Columbia and St. Paul's Hospital,  
Vancouver, BC, Canada

<sup>c</sup>Division of Geriatrics, Sichuan Provincial People's Hospital, Chengdu, Sichuan, China

Running title: PXR, CAR polymorphisms and risk of ATDH

\*Corresponding author: Dr. Jian-Qing He

Address: Department of Respiratory and Critical Care Medicine, West China Hospital, Sichuan  
University, No. 37 Guo-xue alley, Chengdu 610041, Sichuan Province, China.

Tel:01186-18980602293; Fax: 01186-85422571; E-mail: [jianqhe@gmail.com](mailto:jianqhe@gmail.com)

Y.W., X.X., W.W.H. contributed equally to this work.

## Legends

Table S1: Characteristics of the SNPs in this study.

Table S2: SNP-SNP interaction analyzed with MDR.

Table S3: Primer and probe information for the 13 tagSNPs detected by improved multiplex ligation detection reaction (iMLDR).

Fig. S1: Statistical power of each SNP in PXR. The power was calculated by Power and Simple Size Calculation Software.

Fig. S2: Statistical power of each SNP in CAR. The power was calculated by Power and Simple Size Calculation Software.

Fig. S3: Linkage disequilibrium (LD) plots for the SNPs between 3000bp upstream and 300bp downstream of PXR based on the Chinese Beijing Han HapMap population. (A) The  $D'$  LD measure and (B) the  $r^2$  LD measurement. The strength of the LD between SNPs is indicated by the color scheme, measured using  $D'$  and  $r^2$  statistics.

Fig. S4: Linkage disequilibrium (LD) plots for the SNPs between 3000bp upstream and 300bp downstream of CAR based on the Chinese Beijing Han HapMap population. (A) The  $D'$  LD measure and (B) the  $r^2$  LD measurement. The strength of the LD between SNPs is indicated by the color scheme, measured using  $D'$  and  $r^2$  statistics.

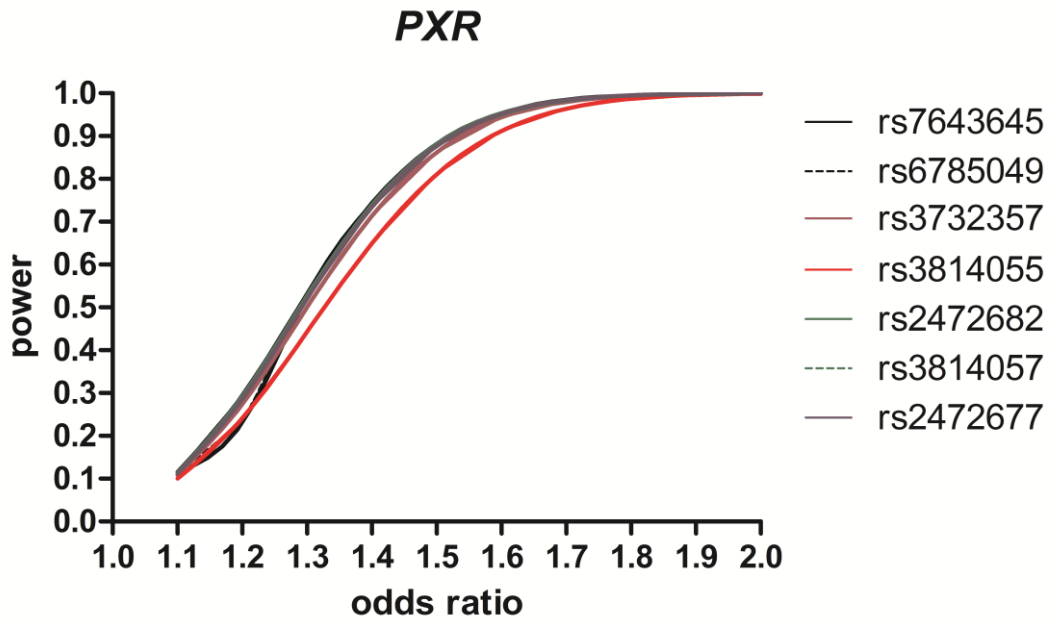

Fig. S1: Statistical power of each SNP in *PXR*. The power was calculated by Power and Simple Size Calculation Software.

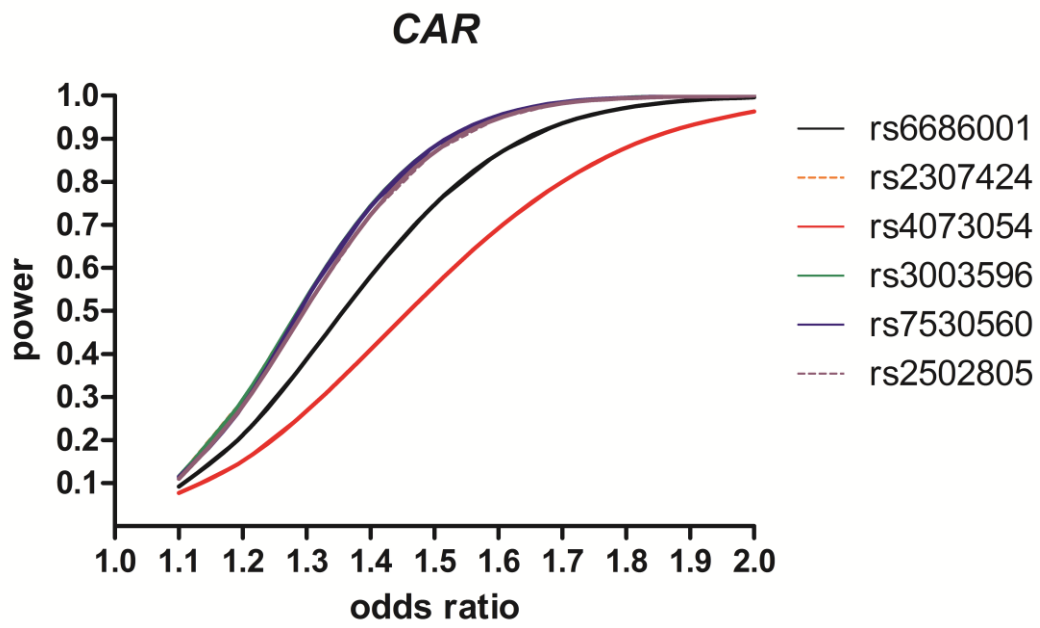

Figure S2: Statistical power of each SNP in *CAR*. The power was calculated by Power and Simple Size Calculation Software.

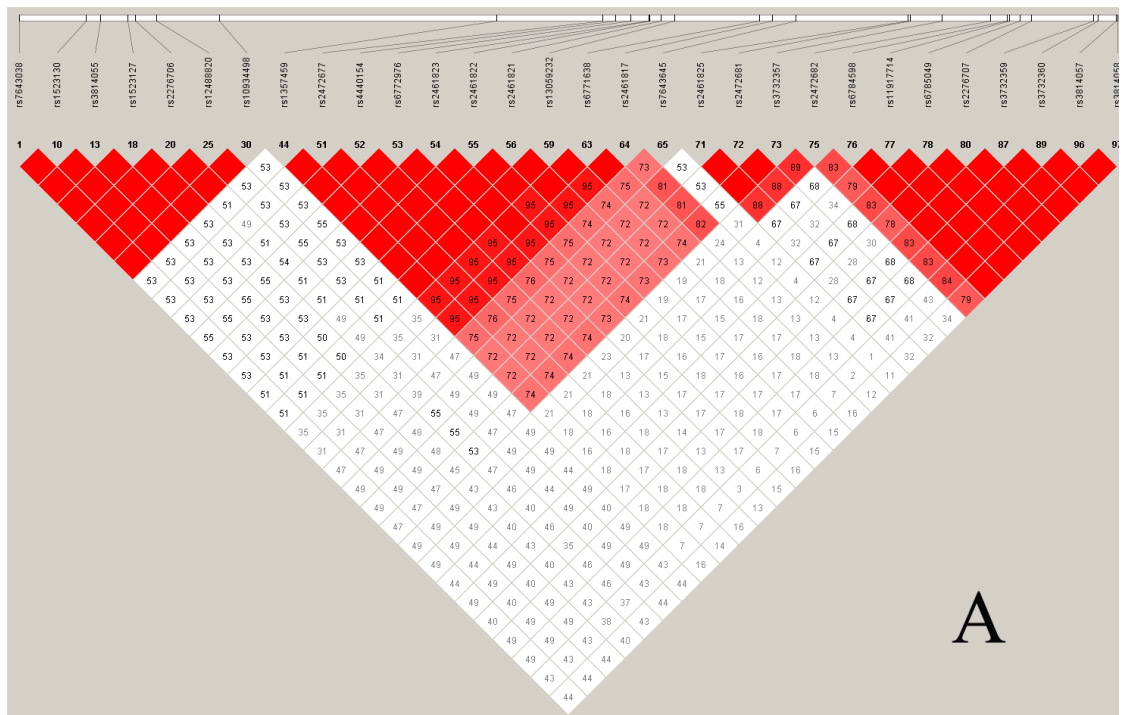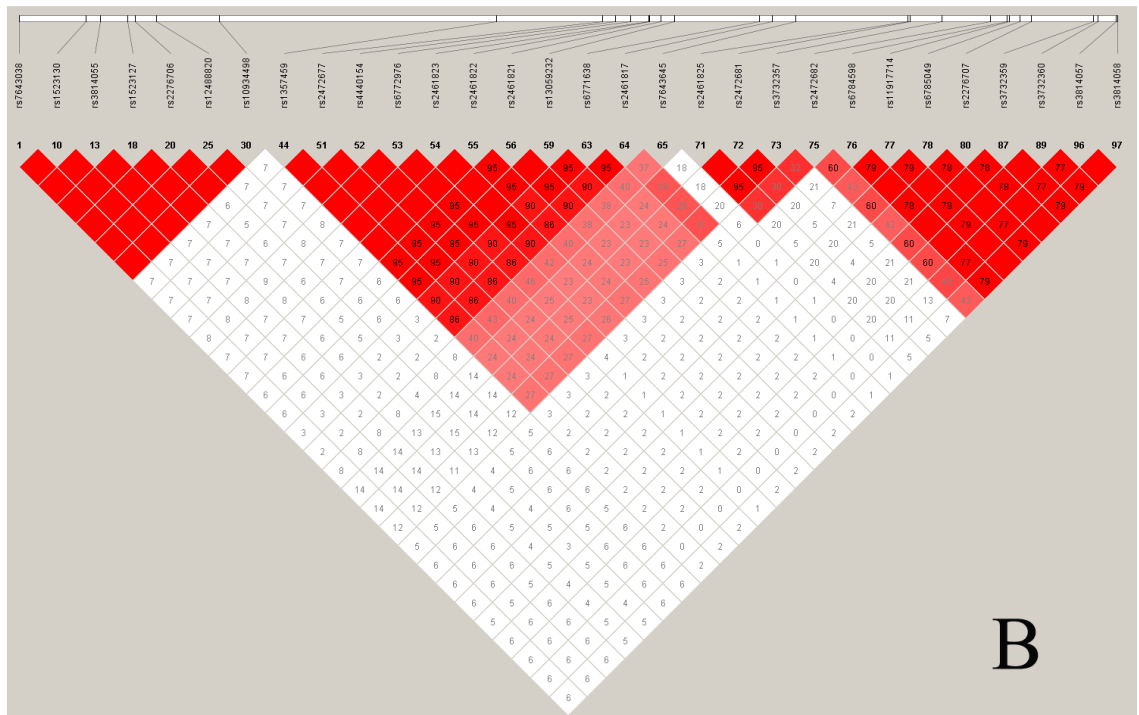

Figure S3: Linkage disequilibrium (LD) plots for the SNPs between 3000bp upstream and 300bp downstream of *PXR* based on the Chinese Beijing Han HapMap population. (A) The  $D'$  LD measure and (B) the  $r^2$  LD measurement. The strength of the LD between SNPs is indicated by the color scheme, measured using  $D'$  and  $r^2$  statistics.

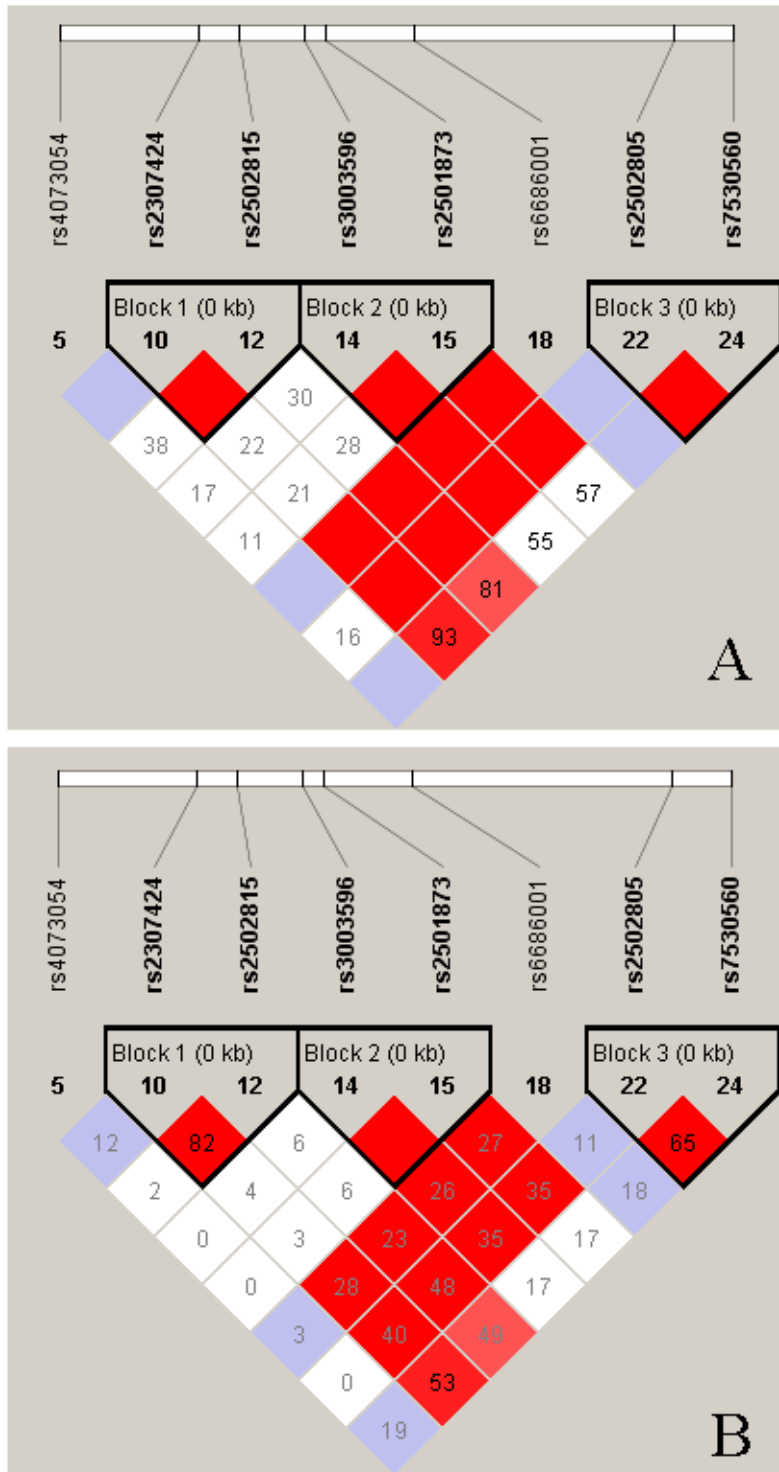

Figure S4: Linkage disequilibrium (LD) plots for the SNPs between 3000bp upstream and 300bp downstream of *CAR* based on the Chinese Beijing Han HapMap population. (A) The  $D'$  LD measure and (B) the  $r^2$  LD measurement. The strength of the LD between SNPs is indicated by the color scheme, measured using  $D'$  and  $r^2$  statistics.
